# Supplementary material
Source: Springer Nature journal article supplement (https://www.springermedizin.de/resource/supplementary/12939_2010_210_MOESM2_ESM.pdf/9550606)

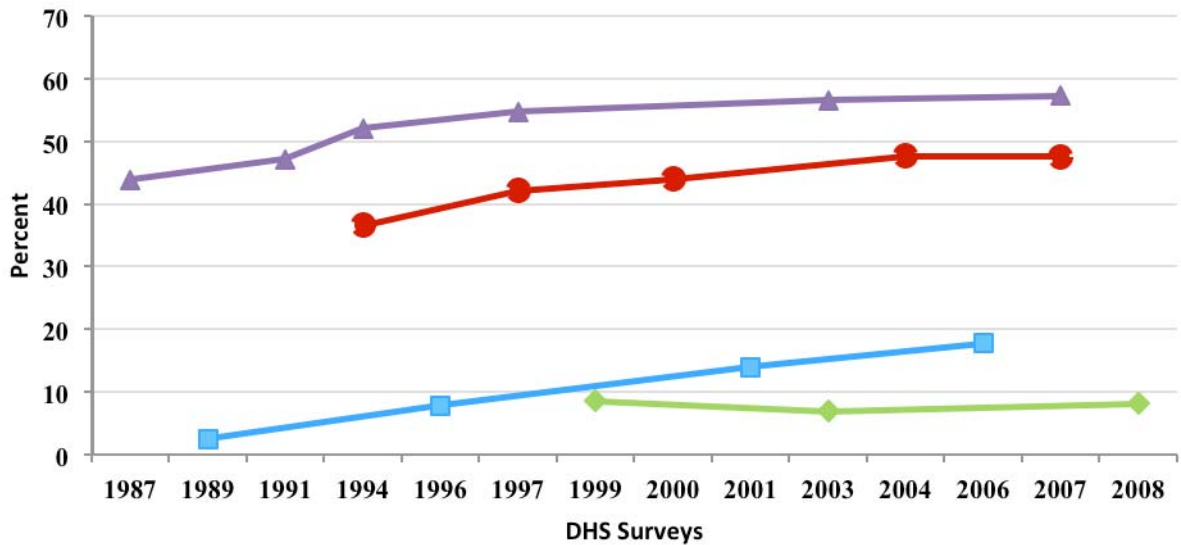

◆ Nigeria

■ Uganda

● Bangladesh

▲ Indonesia

Supplement: MOESM2 [file 9550606]
